# Supplementary material
Source: publisher site journal article supplement (https://www.dovepress.com/article/427764)
Supplement: Supplementary file 1 [file get_supplementary_file.php]

**Table S1. Allergen components of birch pollen [21]**

| Allergen components | Protein family | [molecular weight](javascript:;) | Sensitization pathway | clinical significance |
| --- | --- | --- | --- | --- |
| Bet v 1 | Pathogenesis-related protein (PR-10), Bet v 1 family member | 17 kDa | Airway | Major allergen, PFAS |
| Bet v 2 | Profilin | 15 kDa | Airway | Minor allergen, PFAS |
| Bet v 3 | Polcalcin-like protein (4 EF-hand) | 24 kDa | Airway | Minor allergen |
| Bet v 4 | Polcalcin | 7-8 kDa | Airway | Minor allergen |
| Bet v 6 | Phenylcoumaran benzylic ether reductase | 35 kDa | Airway | Minor allergen, occasionally PFAS |
| Bet v 7 | Cyclophilin | 18 kDa | Airway | Minor allergen |
| Bet v 8 | Glutathione-S-transferase | 27 kDa | Airwa | Minor allergen |

Reference [21] [WHO/IUIS Allergen Nomenclature Sub-committee](http://www.allergen.org/committee.php). http://www.allergen.org/
